# Supplementary material
Source: PubMed Central journal article supplement (PMC3029707)
Supplement: 1011915108_pnas.1011915108_SI.pdf [file 1011915108_pnas.1011915108_SI.pdf]

# Supporting Information

Winkel et al. 10.1073/pnas.1011915108

## SI Text

**Major Aquifers, Depth-Resolved Arsenic Probabilities, and Database.** Movie S1 shows major aquifers of the Red River delta depicted at depth intervals of 2, 4, or 10 m. Movie S2 shows the probability of As contamination in Holocene and Pleistocene aquifers shown in 2-meter depth intervals. Dataset 1 provides the full database of

measured elements, major ions, and further parameters in groundwater of the Red River delta, Vietnam.

## Other Supporting Information Files

[Dataset S1 \(XLS\)](#)

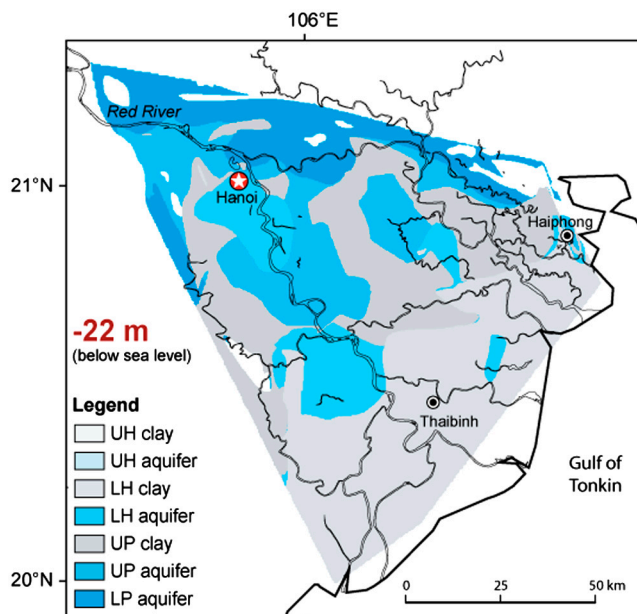

**Movie S1.** Three-dimensional distribution of sedimentary units in the Red River delta (Vietnam), shown from ground level (surface) to 100 m depth. Depths are given in meters below sea level. The sedimentary units were obtained by stratigraphic interpretation and interpolation (ordinary kriging) of 94 sediment cores that were drilled by the Northern Hydrogeological and Engineering Geology Division (NHEGD). White coloring below the interpolated triangle represents depositions of Neogene age.

[Movie S1 \(MOV\)](#)
